# Supplementary material for: High-grade serous ovarian carcinoma organoids as models of chromosomal instability
Source: eLife. 2023 May 11;12:e83867. doi: 10.7554/eLife.83867 (PMC10174694; doi:10.7554/eLife.83867)
Supplement: Supplementary file 2. [file elife-83867-supp2.xlsx]

## Sheet: Mutation analysis
Sample Name	Patient ID	Sample Type	Gene	cDNA modification	Protein modification	Chromosome	Position	Allele fraction 1	Allele fraction 2	Depth 1	Depth 2
23868	75	Ascites	TP53	c.991C>T	p.Q331*	chr17	7576855	0.943	0.986	4134	4766
32077	366	Ascites	BRCA1	c.4065_4068del	p.N1355Kfs*10	chr17	41243479	0.996	0.995	3967	4630
32077	366	Ascites	TP53	c.783del	p.S261Rfs*84	chr17	7577154	0.985	0.974	2266	2615
54059	366	Ascites	BRCA1	c.4083G>A	p.M1361I	chr17	41243465	0.315	0.403	6067	6534
54059	366	Ascites	RAD51B	c.515T>G	p.L172W	chr14	68352648	0.543	0.464	4715	4690
54059	366	Ascites	TP53	c.783del	p.S261Rfs*84	chr17	7577154	0.979	0.995	2807	3183
54059	366	Ascites	BRCA1	c.4065_4068del	p.N1355Kfs*10	chr17	41243479	0.998	0.999	6332	6697
54276	297	Ascites	TP53	c.661G>T	p.E221*	chr17	7578188	0.989	0.989	2897	3109
54288	409	Ascites	TP53	c.673-2A>C		chr17	7577610	0.608	0.57	970	1406
54327	413	Ascites	BRIP1	c.2542C>A	p.R848S	chr17	59770824	0.98	0.973	3237	3277
54327	413	Ascites	TP53	c.320_333del	p.Y107Wfs*37	chr17	7579353	0.99	0.996	9858	9856
118976	466	Ascites	TP53	c.824G>A	p.C275Y	chr17	7577114	0.472	0.482	7286	6691
119025	839	Ascites	TP53	c.536A>G	p.H179R	chr17	7578394	0.838	0.931	9882	9885
119058	466	Ascites	TP53	c.824G>A	p.C275Y	chr17	7577114	0.983	0.976	1599	1317
119148	627	Ascites	TP53	c.817C>T	p.R273C	chr17	7577121	0.802	0.874	6165	6659
119178	788	Ascites	FANCM	c.3280T>G	p.L1094V	chr14	45645237	0.748	0.803	5464	6667
119178	788	Ascites	TP53	c.772G>T	p.E258*	chr17	7577509	0.976	0.991	7762	9689
119178	788	Ascites	BRCA1	c.335_363del	p.N112Sfs*20	chr17	41256216	0.99	0.99	1457	2308
151723	920	Ascites	TP53	c.824G>A	p.C275Y	chr17	7577114	0.996	0.999	5605	3662
151761	467	Ascites	CDK12	c.116T>A	p.V39E	chr17	37618440	0.28	0.222	9756	7680
151761	467	Ascites	TP53	c.824G>A	p.C275Y	chr17	7577114	0.796	0.86	9676	6922
151773	571	Ascites	BRCA1	c.5314C>T	p.R1772*	chr17	41209095	0.82	0.765	6858	7617
151773	571	Ascites	TP53	ND
PDO1	920	Organoid	TP53	c.527G>T	p.C176F	chr17	7578403	0.999	0.998	9562	9730
PDO1	920	Organoid	NF1	c.2033dup	p.I679Dfs*21	chr17	29553477	0.92	0.869	4212	4203
PDO2	75	Organoid	TP53	c.991C>T	p.Q331*	chr17	7576855	0.99	0.989	506	363
PDO3	466	Organoid	TP53	c.824G>A	p.C275Y	chr17	7577114	0.997	0.995	6261	8449
PDO4	571	Organoid	BRCA1	c.5314C>T	p.R1772*	chr17	41209095	0.998	0.999	9030	6930
PDO4	571	Organoid	TP53	ND
PDO5	627	Organoid	TP53	c.817C>T	p.R273C	chr17	7577121	0.997	0.994	4432	7603
PDO5	627	Organoid	BRCA2	c.506A>G	p.K169R	chr13	32900409	1	0.999	1964	3069
PDO6	627	Organoid	TP53	c.817C>T	p.R273C	chr17	7577121	0.996	0.995	5513	6893
PDO6	627	Organoid	BRCA2	c.506A>G	p.K169R	chr13	32900409	0.997	0.997	2963	3090
PDO7	366	Organoid	BRCA1	c.4065_4068del	p.N1355Kfs*10	chr17	41243479	0.999	0.997	5952	4377
PDO7	366	Organoid	TP53	c.783del	p.S261Rfs*84	chr17	7577154	0.999	0.999	2845	2595
PDO8	366	Organoid	BRCA1	c.1367T>C	p.I456T	chr17	41246181	0.301	0.209	6535	5981
PDO8	366	Organoid	BRCA1	c.4065_4068del	p.N1355Kfs*10	chr17	41243479	0.997	0.998	6768	5421
PDO8	366	Organoid	TP53	c.783del	p.S261Rfs*84	chr17	7577154	0.997	0.996	3510	3416
PDO8	366	Organoid	RAD51B	c.515T>G	p.L172W	chr14	68352648	0.543	0.506	4252	3919
PDO9	466	Organoid	TP53	c.824G>A	p.C275Y	chr17	7577114	0.982	0.988	436	584
PDO10	788	Organoid	FANCM	c.3280T>G	p.L1094V	chr14	45645237	0.74	0.702	6981	6096
PDO10	788	Organoid	TP53	c.772G>T	p.E258*	chr17	7577509	0.999	0.991	9636	8995
PDO10	788	Organoid	BRCA1	c.335_363del	p.N112Sfs*20	chr17	41256216	0.997	0.991	3673	2662
PDO11	413	Organoid	BRIP1	c.2542C>A	p.R848S	chr17	59770824	0.999	0.999	2497	3381
PDO11	413	Organoid	TP53	c.320_333del	p.Y107Wfs*37	chr17	7579353	0.995	0.996	9898	9866
PDO12	467	Organoid	TP53	c.824G>A	p.C275Y	chr17	7577114	0.995	0.996	5716	7616
PDO13	297	Organoid	BRCA1	c.1259A>G	p.D420G	chr17	41246289	0.998	0.999	2895	4497
PDO13	297	Organoid	NF1	c.4662G>A	p.V1554V	chr17	29588813	0.188	0.139	85	115
PDO13	297	Organoid	TP53	c.661G>T	p.E221*	chr17	7578188	0.998	0.998	5578	8105
PDO14	409	Organoid	TP53	c.673-2A>C		chr17	7577610	0.986	0.998	587	493
PDO16	839	Organoid	TP53	c.536A>G	p.H179R	chr17	7578394	0.607	0.718	9894	9873
