# Supplementary material for: High-grade serous ovarian carcinoma organoids as models of chromosomal instability
Source: eLife. 2023 May 11;12:e83867. doi: 10.7554/eLife.83867 (PMC10174694; doi:10.7554/eLife.83867)
Supplement: Supplementary file 3. [file elife-83867-supp3.xlsx]

## Sheet: Sheet1
Patient ID	Gene	Variant	clinical_relevance
47	ND
75	ND
297	BRCA1	c.1259A>G	unknown
333	ND
348	ND
366	NA
409	BRCA2	c.68-7T>A	unknown
413	ND
466	ND
467	ND
571	ND
627	BRCA2	c.506A>G	likely benign
788	NA
839	NA
920	ND
